# Supplementary material
Source: PubMed Central journal article supplement (PMC3927644)
Supplement: NIHMS541192-supplement-01.pdf [file NIHMS541192-supplement-01.pdf]

## Supplement

### *PKA catalytic subunit compartmentation regulates contractile and hypertrophic responses to $\beta$ -adrenergic signaling*

Jason H. Yang, Ph.D., Renata K. Polanowska-Grabowska, Ph.D., Jeffrey S. Smith, B.S., Charles W. Shields, IV, B.S., Jeffrey J. Saucerman, Ph.D.

## Methods

### *Cardiomyocyte Isolation and Culture*

Neonatal rat ventricular myocytes were isolated from 1-2 day old Sprague-Dawley rats using the Neomyt Cardiomyocyte Isolation Kit (Cellutron Life Technologies, Baltimore, MD) and cultured on Surecoat-treated 35 mm glass-bottom dishes (MatTek, Ashland, MA), Surecoat-treated 6-well plates or CellBIND-coated 96-well plates (Corning, Corning, NY) as described previously [1]. All procedures were performed in accordance with the Guide for the Care and Use of Laboratory Animals published by the National Institutes of Health and approved by the University of Virginia Institutional Animal Care and Use Committee. Myocytes were cultured in media containing 65% Dulbecco's Modified Eagle Medium, 17% Medium 199, 10% horse serum, 5% fetal bovine serum, 2% penicillin / streptomycin and 1% L-glutamine on either 35 mmol/L glass-bottom dishes (MatTek, Ashland, MA) or CellBIND coated 96-well plates (Corning, Corning, NY).

### *Spatially Targeted PKA Over-Expression*

mCherry-labeled PKA catalytic subunits containing a C-terminal nuclear export sequence (-NES) or nuclear localization sequence (-NLS) were constructed by ligating the respective PKA-NES or PKA-NLS segments from CMV-EGFP-PKA-NES [2] or CMV-EGFP-PKA-NLS [2] into the mCherry-C1 expression vector (Clontech, Mountain View, CA) at the BSPEI/BamHI restriction sites. Targeted PKA over-expression was achieved using Lipofectamine 2000 (Invitrogen, Carlsbad, CA), following the manufacturer's instructions.

### *Ca<sup>2+</sup> Imaging*

Two days after isolation, myocytes cultured in 35 mm glass-bottom dishes were transferred to serum-free media (76.8% Dulbecco's Modified Eagle Medium, 19.2% Medium 199, 2% penicillin / streptomycin and 1% insulin-transferrin-sodium selenite) for 24 hours. Three days after isolation, cultured myocytes were loaded by incubating in Fluo-4 AM (Invitrogen, Carlsbad, CA) dissolved in Tyrode's Solution for 30 minutes. Loaded myocytes were then de-esterified by washing out the Fluo-4/Tyrode's mixture and incubating myocytes for an additional 30 minutes in Tyrode's Solution. De-esterified myocytes were then field stimulated at 1 Hz pacing using the C-Pace EP Culture Pacer (IonOptix, Milton, MA) and stimulated using isoproterenol (ISO; Tocris, Minneapolis, MN) dissolved in Tyrode's Solution. Paced myocytes were imaged on an IX-81 inverted microscope (Olympus, Center Valley, PA) with a Digital CCD C9300-221 camera (Hamamatsu, Bridgewater, NJ) at 10 Hz using MetaMorph (Molecular Devices, Sunnyvale, CA). Cells were segmented in ImageJ (National Institutes of Health, Bethesda, MA) and analyzed in MATLAB (Mathworks, Natick, MA).

### *Hypertrophy Measurements*

Two days after isolation, myocytes cultured in 96-well plates were transfected with cTnT-EGFP plasmid [3] using Lipofectamine 2000. Two days following transfection, myocytes were cultured in serum-free media containing various concentrations of ISO for 24 hours. Following incubation, myocytes were imaged on an Olympus IX-81 inverted microscope with an automated stage (Prior Scientific, Rockland, MA) and an Orca-AG CCD camera (Hamamatsu, Bridgewater, NJ) using IPLab (Scanalytics, Fairfax,

VA), as described previously[1]. Images were segmented and analyzed in MATLAB using custom image processing algorithms.

#### *FRET Imaging*

Two days after isolation, myocytes cultured in 35 mmol/L glass-bottom dishes were transfected with CMV-AKAR-NES [4], CMV-AKAR-NLS [4], CMV-ICUE-NES [5] or CMV-ICUE-NLS [5] plasmid using Lipofectamine 2000. Following transfection, myocytes were cultured in serum-free media for 24 hours. Following incubation, myocytes were washed and incubated in Tyrode's Solution. Imaging was performed on an Olympus IX-81 inverted microscope with an Orca-AG CCD camera using IPLab. Cells were segmented in ImageJ and analyzed in MATLAB. One minute after the beginning of each experiment, Tyrode's Solution was added to each dish as a negative control. Cells were then treated with ISO dissolved in Tyrode's Solution at different concentrations. Finally, cells were treated with 50  $\mu$ mol/L forskolin (FSK; Tocris, Minneapolis, MN) and 100  $\mu$ mol/L 3-isobutyl-1-methylxanthine (IBMX; Sigma-Aldrich, St. Louis, MO) as a positive control. FRET computations were performed in MATLAB using the PFRET algorithm [6]. Cells were then segmented in ImageJ and FRET responses were normalized to positive and negative controls in MATLAB. For wheat germ agglutinin (WGA, Sigma-Aldrich, St. Louis, MO) experiments, myocytes were pre-incubated in Tyrode's Solution with 20  $\mu$ g/mL WGA before each experiment.

#### *Computational Modeling*

Nuclear PKA activity was modeled by modifying our previously published ordinary differential equation implementation of cardiac  $\beta$ -adrenergic signaling [7-9] to include nuclear PKA transport, PKI transport and AKAR expression/phosphorylation (*Supplement*). The expanded model was implemented in MATLAB and constrained to parameters estimated from published literature. The final model contained 34 state variables and 104 parameters. Before each simulation, fresh initial conditions were generated by running the model to steady-state with no ISO stimulation.

#### *Immunofluorescence*

Two days after isolation, myocytes cultured in 35 mmol/L glass-bottom dishes were fixed in 4% paraformaldehyde (Fisher Scientific, Pittsburgh, PA) for 20 minutes. Myocytes were then permeabilized with 0.2% Triton X-100 (MP Biomedicals, Solon, OH) for 2 minutes. Myocytes were then blocked with 1% bovine serum albumin (Sigma-Aldrich, St. Louis, MO) for 45 minutes. After blocking, myocytes were incubated with 1:200 rabbit polyclonal anti-PKIA primary antibodies (Lifespan Biosciences, Seattle WA) for 1 hour. Myocytes were then blocked with 2% normal goat serum (Sigma-Aldrich, St. Louis, MO) for 30 minutes. After blocking, myocytes were incubated with 1:200 goat anti-rabbit secondary antibodies conjugated with Alexa fluorophors (Invitrogen, Carlsbad, CA). Following washout, cells were imaged on an Olympus IX-81 inverted microscope with an Orca-AG CCD camera using IPLab. Cells were analyzed using ImageJ.

#### *Western Blot Measurements*

Two days after isolation, myocytes cultured in 6-well plates were treated with ISO for 30 minutes and then rinsed with ice cold phosphate buffered solution. Cellular lysates were prepared in Pierce RIPA Buffer (Thermo Scientific, Rockford, IL) supplemented with Complete Protease Inhibitor Cocktail Tablets (Roche, Indianapolis, IN) and Halt Phosphatase Inhibitor Cocktail (Thermo Scientific, Rockford, IL). To quantify nuclear PKA catalytic subunit accumulation, cells were fractionated into nuclear and cytosolic fractions using NE-PER Nuclear Protein Extraction Kit (Thermo Scientific) supplemented with Protease Inhibitor Cocktail. Protein concentrations from cell lysates were quantified using the Micro BCA Protein Assay Kit (Thermo Scientific, Rockford, IL) and all samples were normalized for protein concentration. Lysed cells were then mixed with 4x SDS-sample buffer. Samples for pCREB detection were boiled for 5 min at 95°C. Equal amounts of total protein from each sample were electrophoresed on 10% SDS-PAGE gels and then electrotransferred onto Immobilon-FL PVDF membranes (Millipore,

Billerica, MA) at 100 V for 1 hour. These membranes were rinsed with phosphate buffer solution and then incubated with Odyssey Blocking Buffer (LI-COR Biosciences, Lincoln, NE). The membranes were probed with affinity-purified rabbit polyclonal antibodies specific for PKA C $\alpha$  (Cell Signaling Technology, Danvers, MA). Mouse anti-fibrillarin antibodies (Abcam, Cambridge, England) were used as nuclear loading controls, while mouse anti- $\alpha$ -tubulin antibodies (LI-COR Biosciences, Lincoln, NE) were used as cytosolic loading controls. To quantify CREB and phospholamban (PLB) phosphorylation, samples were resolved on 15% SDS-polyacrylamide gels by electrophoresis and then transferred to Immobilon-FL PVDF membranes (Millipore, Billerica, MA). Blots were probed using rabbit anti-phospho-PLB (Ser16/Thr17) or rabbit anti-phospho-CREB (Ser133) antibodies (Cell Signaling Technology). Mouse anti- $\alpha$ -tubulin antibodies (LI-COR Biosciences) were used as protein loading controls. Phosphorylated PLB and CREB were visualized using goat anti-rabbit IRDye800 CW secondary antibodies, while  $\alpha$ -tubulin was detected using goat anti-mouse IRDye680 CW secondary antibodies (LI-COR Biosciences). All membranes were scanned on a LI-COR Odyssey scanner. Signal intensities for each experiment were quantified using Image Studio Lite (LI-COR Biosciences). All bands were normalized to their respective loading controls.

### *Statistics*

All statistical analyses were performed using Prism 5.0 (GraphPad, La Jolla, CA). EC<sub>50</sub>s for ISO-stimulated Ca<sup>2+</sup> enhancements, hypertrophy, FRET responses and PLB and CREB phosphorylation were fitted to a variable slope dose-response curve. Unpaired *t*-tests were performed on ICUE and AKAR t<sub>50</sub>s for statistical significance. A one-way ANOVA was performed on Western blot measurements of nuclear PKA catalytic subunit enrichment. Non-parametric Mann-Whitney tests were performed on hypertrophy measurements. Hypertrophy measurements are reported as median $\pm$ standard error of median. All other statistics are reported as mean $\pm$ standard error of mean.

## Supplementary Figures

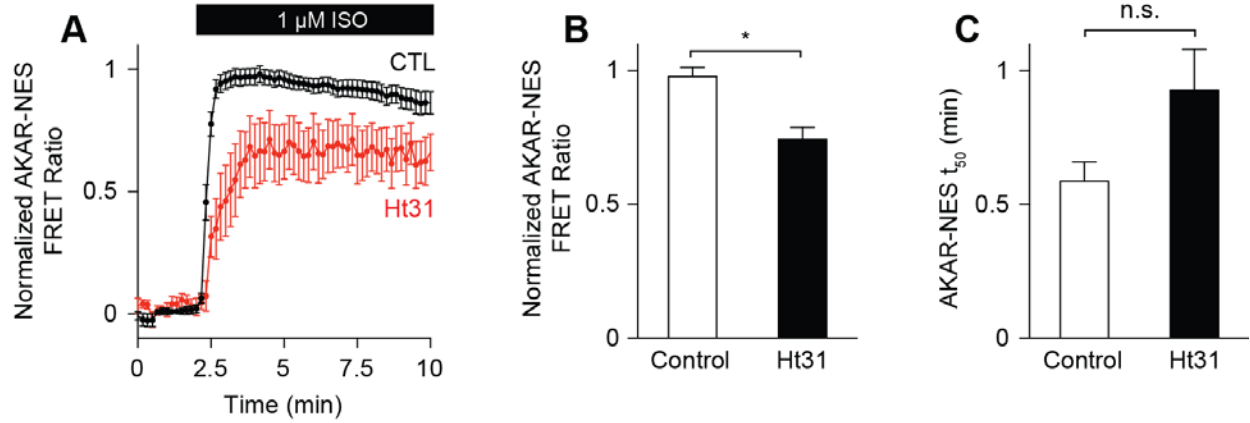

**Fig. S1.** AKAP disruption reduces cytosolic PKA responses to 1  $\mu\text{mol/L}$  ISO. A, Mean cytosolic AKAR-NES responses to 1  $\mu\text{mol/L}$  ISO following pre-treatment with 50  $\mu\text{mol/L}$  Ht31 ( $n = 8$  cells). Ht31 pre-treatment significantly reduces the peak amplitude (B), but does not significantly alter the  $t_{50}$  (C).

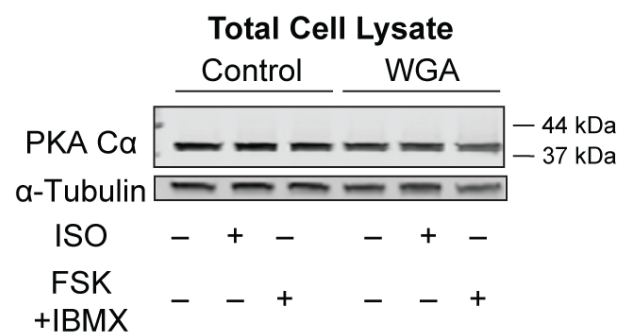

**Fig. S2.** Representative Western blots for PKA catalytic subunits from whole cell lysates of control myocytes and cells pre-treated with 20  $\mu$ g/mL WGA. WGA pre-treatment does not alter whole cell catalytic subunit expression.

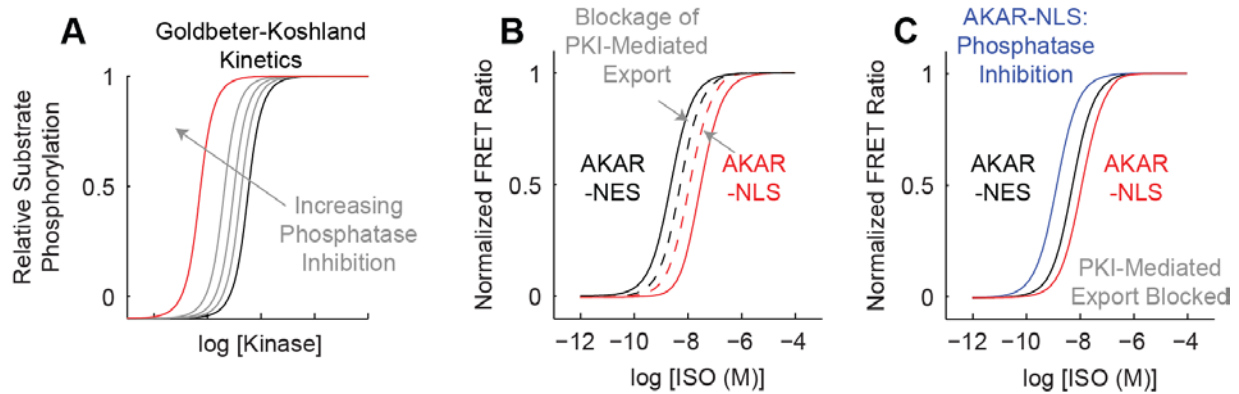

**Fig. S3.** PKI-mediated export of nuclear PKA catalytic subunit may contribute to differences in ISO sensitivity between cytosolic and nuclear PKA activity. A, Goldbeter-Koshland kinetics can be used to model steady-state substrate phosphorylation in a simplified system consisting of only a kinase, substrate and phosphatase [10]. Intuitively, in this system phosphatase inhibition increases the sensitivity of substrate phosphorylation to a kinase. In contrast, the computational model for nuclear PKA activity in cardiac myocytes makes a counter-intuitive prediction that phosphatase inhibition does not increase the sensitivity of nuclear PKA activity to ISO stimulation (Fig. 5B). B, The computational model predicts that PKI-mediated export of nuclear PKA catalytic subunits contributes to the lower ISO sensitivity differences between cytosolic and nuclear PKA activity. C, Under conditions of blocked PKI-mediated PKA-C export, phosphatase inhibition does increase the ISO sensitivity of AKAR-NLS (similar to that seen with Goldbeter-Koshland kinetics). Thus in normal cells it appears that PKI-mediated export acts as an alternative brake on nuclear PKA activity, reducing the effect of phosphatase inhibition on ISO sensitivity. Blockage of PKI-mediated export increases total nuclear PKA and restores the intuitive sensitivity of nuclear PKA activity to phosphatase inhibition.

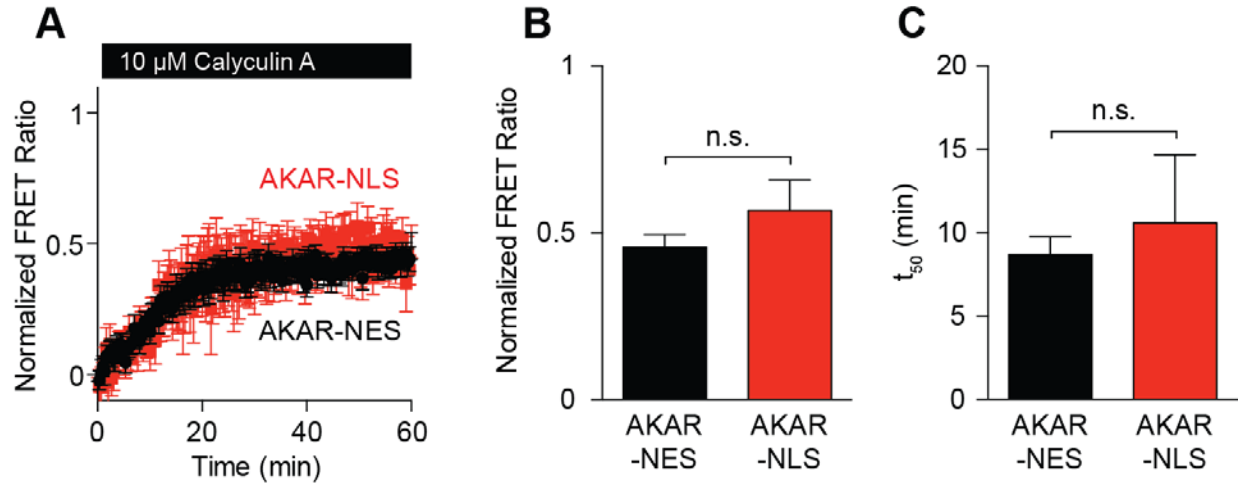

**Fig. S4.** Phosphatase inhibition reveals basal cytosolic and nuclear phosphatase activity. A, Mean AKAR-NES and AKAR-NLS responses to 10  $\mu$ mol/L Calyculin A ( $n \geq 9$  cells each). AKAR-NES and AKAR-NLS responses shared similar peak amplitudes (B) and kinetics (C).

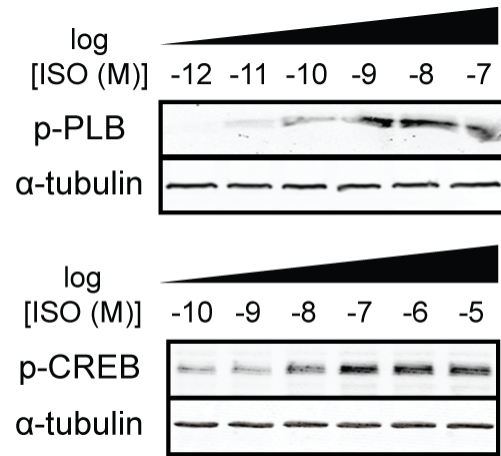

**Fig. S5.** Representative Western blots for differential ISO sensitivity of endogenous PKA substrates. PLB phosphorylation has significantly higher ISO sensitivity than CREB phosphorylation.

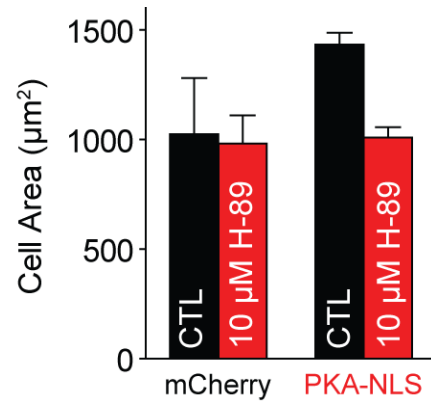

**Fig. S6.** Cell hypertrophy responses to 10 μmol/L H-89. 10 μmol/L H-89 blocked PKA-NLS induced cell hypertrophy, indicating a specific action by the PKA catalytic subunit (n > 100 cells each).

## Model Equations and Parameters

### *β-Adrenergic Receptor / Gsa*

| Parameter   | Description                                   | Value   | Units         | Source |
|-------------|-----------------------------------------------|---------|---------------|--------|
| ISO         | isoproterenol concentration (when used)       | 1       | μmol/L        | -      |
| b1ARtot     | total β1-adrenergic receptors                 | 0.0132  | μmol/L        | [7-8]  |
| Gstot       | total Gs protein                              | 3.83    | μmol/L        | [7]    |
| kf_LR       | β1-AR binding to ligand                       | 1       | 1/[μmol/L ms] | [7-8]  |
| kr_LR       | β1-AR binding to ligand                       | 0.285   | 1/ms          | [7-8]  |
| kf_LRG      | ligand bound β1-AR associating with G-protein | 1       | 1/[μmol/L ms] | [7-8]  |
| kr_LRG      | ligand bound β1-AR associating with G-protein | 0.062   | 1/ms          | [7-8]  |
| kf_RG       | unbound β1-AR associating with G-protein      | 1       | 1/[μmol/L ms] | [7-8]  |
| kr_RG       | unbound β1-AR associating with G-protein      | 33.0    | 1/ms          | [7-8]  |
| k_G_act     | Gs-alpha activation                           | 16.0e-3 | 1/ms          | [7-8]  |
| k_G_hyd     | Gs-alpha hydrolysis                           | 0.8e-6  | 1/ms          | [7-8]  |
| k_G_reassoc | Gs-alpha reassociation                        | 1.21    | 1/[μmol/L ms] | [7-8]  |
| kf_bark     | β1-AR desensitization by β-arrestin           | 1.1e-6  | 1/ms          | [7-8]  |
| kr_bark     | β1-AR resensitization                         | 2.2e-6  | 1/ms          | [7-8]  |
| kf_pka      | β1-AR desensitization by PKA                  | 3.6e-6  | 1/[μmol/L ms] | [7-8]  |
| kr_pka      | β1-AR resensitization                         | 2.2e-6  | 1/ms          | [8]    |

$$b1AR_{act} = b1AR_{tot} - b1AR_{S464} - b1AR_{S301}$$

$$b1AR = b1AR_{act} - LR - LRG - RG$$

$$Gs = Gstot - LRG - RG - Gs_{by}$$

$$\frac{dLR}{dt} = kf_{LR} \cdot ISO \cdot b1AR - kr_{LR} \cdot LR$$

$$\frac{dLRG}{dt} = kf_{LRG} \cdot LR \cdot Gs - kr_{LRG} \cdot LRG - k_{G_{act}} \cdot LRG$$

$$\frac{dRG}{dt} = kf_{RG} \cdot b1AR \cdot Gs - kr_{RG} \cdot RG - k_{G_{act}} \cdot RG$$

$$\frac{db1AR_{S464}}{dt} = kf_{bARK} \cdot (LR + LRG) - kr_{bARK} \cdot b1AR_{S464}$$

$$\frac{db1AR_{S301}}{dt} = kf_{PKA} \cdot PKA \cdot b1AR_{act} - kr_{PKA} \cdot b1AR_{S301}$$

$$\frac{dGsaGTP_{tot}}{dt} = k_{G_{act}} \cdot (RG + LRG) - k_{G_{hyd}} \cdot GsaGTP_{tot}$$

$$\frac{dGsaGDP}{dt} = k_{G_{hyd}} \cdot GsaGTP_{tot} - k_{G_{reassoc}} \cdot GsaGDP \cdot Gs_{by}$$

$$\frac{dGsby}{dt} = k_{G\_act} \cdot (RG + LRG) - k_{G\_reassoc} \cdot GsaGDP \cdot Gsby$$

### *cAMP*

| Parameter   | Description                             | Value    | Units         | Source |
|-------------|-----------------------------------------|----------|---------------|--------|
| ACtot       | total adenylyl cyclase                  | 49.7e-3  | μmol/L        | [7-8]  |
| ATP         | total ATP                               | 5.0e3    | μmol/L        | [7-8]  |
| PDEtot      | total phosphodiesterases                | 22.85e-3 | μmol/L        | [7]    |
| IBMX        | isobutylmethylxanthine concentration    | 0.0      | μmol/L        | [8]    |
| FSK         | forskolin concentration                 | 0.0      | μmol/L        | [8]    |
| k_AC_basal  | basal AC activity                       | 0.2e-3   | 1/ms          | [7-8]  |
| Km_AC_basal | basal AC affinity for ATP               | 1.03e3   | μmol/L        | [7-8]  |
| k_AC_Gsa    | AC activity with Gs-alpha activation    | 8.5e-3   | 1/ms          | [8]    |
| Km_AC_Gsa   | AC:Gs-alpha affinity for ATP            | 315.0    | μmol/L        | [7-8]  |
| kf_AC_Gsa   | AC activation by Gs-alpha               | 1        | 1/[μmol/L ms] | [8]    |
| kr_AC_Gsa   | AC activation by Gs-alpha               | 0.4      | 1/ms          | [8]    |
| k_AC_FSK    | AC activation by forskolin              | 7.3e-3   | 1/ms          | [8]    |
| Km_AC_FSK   | AC:FSK affinity for ATP                 | 860.0    | μmol/L        | [8]    |
| kf_AC_FSK   | AC activation by forskolin              | 1        | 1/[μmol/L ms] | [8]    |
| kr_AC_FSK   | AC activation by forskolin              | 44       | 1/ms          | [8]    |
| k_cAMP_PDE  | cAMP degradation by PDEs                | 5.0e-3   | 1/ms          | [8]    |
| k_cAMP_PDEp | cAMP degradation by phosphorylated PDEs | 10.0e-3  | 1/ms          | [11]   |
| Km_PDE_cAMP | PDE affinity for cAMP                   | 1.3      | μmol/L        | [7-8]  |
| Kd_PDE_IBMX | PDE inhibition by IBMX                  | 30.0     | μmol/L        | [7-8]  |
| k_PKA_PDE   | PDE phosphorylation by PKA              | 7.5e-3   | 1/ms          | [11]   |
| k_PP_PDE    | PDE inhibition by IBMX                  | 1.5e-3   | 1/ms          | [11]   |

$$cAMP = cAMP_{tot} - (RCcAMP_I + 2 \cdot RCcAMPcAMP_I + 2 \cdot RcAMPcAMP_I) \\ - (RCcAMP_{II} + 2 \cdot RCcAMPcAMP_{II} + 2 \cdot RcAMPcAMP_{II})$$

$$AC = AC_{tot} - AC_{GsaGTP}$$

$$GsaGTP = GsaGTP_{tot} - AC_{GsaGTP}$$

$$\frac{dAC_{GsaGTP}}{dt} = kf_{AC\_Gsa} \cdot GsaGTP \cdot AC - kr_{AC\_Gsa} \cdot AC_{GsaGTP}$$

$$AC_{FSK} = \frac{FSK \cdot AC}{Kd_{AC\_FSK}}$$

$$PDE_{IBMX} = \frac{PDE_{tot} \cdot IBMX}{Kd_{PDE\_IBMX}}$$

$$PDE = PDE_{tot} - PDE_{IBMX} - PDEp$$

$$\frac{dPDEp}{dt} = k_{PKA\_PDE} \cdot PKACII \cdot PDE - k_{PP\_PDE} \cdot PDEp$$

$$PDE_{ACT} = \frac{k_{cAMP\_PDE} \cdot PDE \cdot cAMP}{Km_{PDE\_cAMP} + cAMP} + \frac{k_{cAMP\_PDEp} \cdot PDEp \cdot cAMP}{Km_{PDE\_cAMP} + cAMP}$$

$$\frac{dcAMP_{tot}}{dt} = \frac{k_{AC\_basal} \cdot AC \cdot ATP}{Km_{AC\_basal} + ATP} + \frac{k_{AC\_Gsa} \cdot AC\_GsaGTP \cdot ATP}{Km_{AC\_Gsa} + ATP} + \frac{k_{AC\_FSK} \cdot AC\_FSK \cdot ATP}{Km_{AC\_FSK} + ATP} - \frac{k_{cAMP\_PDE} \cdot PDE \cdot cAMP}{Km_{PDE\_cAMP} + cAMP} - \frac{k_{cAMP\_PDEp} \cdot PDEp \cdot cAMP}{Km_{PDE\_cAMP} + cAMP}$$

#### *PKA / PKI Transport*

| Parameter    | Description                           | Value       | Units | Source |
|--------------|---------------------------------------|-------------|-------|--------|
| VnucF        | nuclear fractional volume             | 0.02        | -     | [12]   |
| DPKInc       | PKI cytosol to nucleus diffusion rate | 19.8e-6     | 1/ms  | -      |
| DPKACInc     | PKA cytosol to nucleus diffusion rate | 1.190476e-7 | 1/ms  | -      |
| DPKACI_PKInc | PKA-PKI active transport rate         | 3.2e-6      | 1/ms  | -      |
| PKIbias      | PKI nuclear expression bias           | 50          | -     | -      |

$$PKI = PKI_{tot} - PKACI\_PKI - PKACII\_PKI - nPKI \cdot VnucF - nPKACII\_PKI \cdot VnucF$$

$$JPKACIcn = DPKACIcn \cdot (PKACI - nPKACI)$$

$$JPKInc = DPKInc \cdot \left( PKI - \frac{nPKI}{PKIbias} \right)$$

$$JPKACII\_PKInc = -DPKACII\_PKInc \cdot nPKACII\_PKI \cdot VnucF$$

*PKA*

| Parameter                 | Description                    | Value  | Units         | Source  |
|---------------------------|--------------------------------|--------|---------------|---------|
| PKAI <sub>tot</sub>       | total type 1 protein kinase A  | 0.59   | μmol/L        | [7]     |
| PKAII <sub>tot</sub>      | total type 2 protein kinase A  | 0.059  | μmol/L        | adapted |
| PKI <sub>tot</sub>        | total protein kinase inhibitor | 0.18   | μmol/L        | [7-8]   |
| kf <sub>RC_cAMP</sub>     | cAMP association with PKA      | 1      | 1/[μmol/L ms] | [7-8]   |
| kr <sub>RC_cAMP</sub>     | cAMP association with PKA      | 1.64   | 1/ms          | [7-8]   |
| kf <sub>RCcAMP_cAMP</sub> | cAMP association with PKA      | 1      | 1/[μmol/L ms] | [7-8]   |
| kr <sub>RCcAMP_cAMP</sub> | cAMP association with PKA      | 9.14   | 1/ms          | [7-8]   |
| kf <sub>RcAMPcAMP_C</sub> | catalytic subunit dissociation | 4.375  | 1/[μmol/L ms] | [7-8]   |
| kr <sub>RcAMPcAMP_C</sub> | catalytic subunit dissociation | 1      | 1/ms          | [7-8]   |
| kf <sub>PKA_PKI</sub>     | PKA inhibition by PKI          | 1      | 1/[μmol/L ms] | [7-8]   |
| kr <sub>PKA_PKI</sub>     | PKA inhibition by PKI          | 0.2e-3 | 1/ms          | [7-8]   |

$$\frac{dRC\_I}{dt} = -kf\_RC\_cAMP \cdot RC\_I \cdot cAMP + kr\_RC\_cAMP \cdot RCcAMP\_I$$

$$\frac{dRCcAMP\_I}{dt} = -kr\_RC\_cAMP \cdot RCcAMP\_I + kf\_RC\_cAMP \cdot RC\_I \cdot cAMP - kf\_RCcAMP\_cAMP \cdot RCcAMP\_I \cdot cAMP + kr\_RCcAMP\_cAMP \cdot RCcAMPcAMP\_I$$

$$\begin{aligned} & \frac{dRCcAMPcAMP\_I}{dt} \\ &= -kr\_RCcAMP\_cAMP \cdot RCcAMPcAMP\_I + kf\_RCcAMP\_cAMP \cdot RCcAMP\_I \cdot cAMP \\ & \quad - kf\_RcAMPcAMP\_C \cdot RCcAMPcAMP\_I + kr\_RcAMPcAMP\_C \cdot RcAMPcAMP\_I \cdot PKACI \end{aligned}$$

$$\begin{aligned} & \frac{dRcAMPcAMP\_I}{dt} \\ &= -kr\_RcAMPcAMP\_C \cdot RcAMPcAMP\_I \cdot PKACI + kf\_RcAMPcAMP\_C \cdot RCcAMPcAMP\_I \end{aligned}$$

$$\frac{dPKACI}{dt} = -kr\_RcAMPcAMP\_C \cdot RcAMPcAMP\_I \cdot PKACI + kf\_RcAMPcAMP\_C \cdot RCcAMPcAMP\_I - kf\_PKA\_PKI \cdot PKACI \cdot PKI + kr\_PKA\_PKI \cdot PKACI\_PKI$$

$$\frac{dPKA\_CI\_PKI}{dt} = -kr\_PKA\_PKI \cdot PKACI\_PKI + kf\_PKA\_PKI \cdot PKACI \cdot PKI$$

$$\frac{dRC\_II}{dt} = -kf\_RC\_cAMP \cdot RC\_II \cdot cAMP + kr\_RC\_cAMP \cdot RCcAMP\_II$$

$$\begin{aligned} \frac{dRCcAMP\_II}{dt} &= -kr\_RC\_cAMP \cdot RCcAMP\_II + kf\_RC\_cAMP \cdot RC\_II \cdot cAMP - kf\_RCcAMP\_cAMP \\ & \quad \cdot RCcAMP\_II \cdot cAMP + kr\_RCcAMP\_cAMP \cdot RCcAMPcAMP\_II \end{aligned}$$

$$\begin{aligned} & \frac{dRcAMPcAMP\_II}{dt} \\ &= -kr\_RcAMP\_cAMP \cdot RcAMPcAMP\_II + kf\_RcAMP\_cAMP \cdot RcAMP\_II \\ & \cdot cAMP - kf\_RcAMPcAMP\_C \cdot RcAMPcAMP\_II + kr\_RcAMPcAMP\_C \\ & \cdot RcAMPcAMP\_II \cdot PKACII \end{aligned}$$

$$\begin{aligned} & \frac{dRcAMPcAMP\_II}{dt} \\ &= -kr\_RcAMPcAMP\_C \cdot RcAMPcAMP\_II \cdot PKACII + kf\_RcAMPcAMP\_C \\ & \cdot RcAMPcAMP\_II \end{aligned}$$

$$\begin{aligned} \frac{dPKACII}{dt} &= -kr\_RcAMPcAMP\_C \cdot RcAMPcAMP\_II \cdot PKACII + kf\_RcAMPcAMP\_C \\ & \cdot RcAMPcAMP\_II - kf\_PKA\_PKI \cdot PKACII \cdot PKI + kr\_PKA\_PKI \cdot PKACII\_PKI \\ & - JPKACIIcn \end{aligned}$$

$$\frac{dPKA\_CII\_PKI}{dt} = -kr\_PKA\_PKI \cdot PKACII\_PKI + kf\_PKA\_PKI \cdot PKACII \cdot PKI - JPKACII\_PKIcn$$

$$\frac{dnPKI}{dt} = kr\_PKA\_PKI \cdot nPKACII\_PKI - kf\_PKA\_PKI \cdot nPKACII \cdot nPKI + \frac{JPKIcn}{VnucF}$$

$$\frac{dnPKACII}{dt} = kr\_PKA\_PKI \cdot nPKACII\_PKI - kf\_PKA\_PKI \cdot nPKACII \cdot nPKI + \frac{JPKACIIcn}{VnucF}$$

$$\begin{aligned} & \frac{dnPKACII\_PKI}{dt} \\ &= -kr\_PKA\_PKI \cdot nPKACII\_PKI + kf\_PKA\_PKI \cdot nPKACII \cdot nPKI \\ & + \frac{JPKACII\_PKIcn}{VnucF} \end{aligned}$$

### *I-1/PP1*

| Parameter    | Description                             | Value   | Units         | Source |
|--------------|-----------------------------------------|---------|---------------|--------|
| PP1tot       | total phosphatase 1                     | 0.89    | μmol/L        | [7-8]  |
| I1tot        | total inhibitor 1                       | 0.3     | μmol/L        | [7-8]  |
| k_PKA_I1     | PKA phosphorylation of inhibitor 1      | 60e-3   | 1/ms          | [7-8]  |
| Km_PKA_I1    | PKA phosphorylation of inhibitor 1      | 1.0     | μmol/L        | [7-8]  |
| Vmax_PP2A_I1 | PP2A dephosphorylation of phospholamban | 14.0e-3 | μmol/L /ms    | [7-8]  |
| Km_PP2A_I1   | PP2A dephosphorylation of phospholamban | 1.0     | μmol/L        | [7-8]  |
| kf_PP1_I1    | PP1 inhibition by inhibitor 1           | 1.0     | 1/[μmol/L ms] | [7-8]  |
| kr_PP1_I1    | PP1 inhibition by inhibitor 1           | 1.0e-3  | 1/ms          | [7-8]  |

$$I1 = I1_{tot} - I1_{ptot}$$

$$PP1 = PP1_{tot} - I1p_{PP1}$$

$$I1p = I1_{ptot} - I1p_{PP1}$$

$$\frac{dI1p_{PP1}}{dt} = kf_{PP1_I1} \cdot PP1 \cdot I1p - kr_{PP1_I1} \cdot I1p_{PP1}$$

$$\frac{dI1_{ptot}}{dt} = \frac{k_{PKA_I1} \cdot PKA_{CI} \cdot I1}{Km_{PKA_I1} + I1} - \frac{Vmax_{PP2A_I1} \cdot I1_{ptot}}{Km_{PP2A_I1} + I1_{ptot}}$$

### *LCC*

| Parameter     | Description                           | Value   | Units  | Source |
|---------------|---------------------------------------|---------|--------|--------|
| LCCtot        | total L-type Ca channel               | 0.025   | μmol/L | [7-8]  |
| PKACII_LCCtot | total PKA local to L-type Ca channel  | 0.025   | μmol/L | [7-8]  |
| PP1_LCC       | total PP1 local to L-type Ca channel  | 0.025   | μmol/L | [7-8]  |
| PP2A_LCC      | total PP2A local to L-type Ca channel | 0.025   | μmol/L | [7-8]  |
| epsilon       | AKAP-mediated scaling factor          | 10      | -      | [7-8]  |
| k_PKA_LCC     | PKA phosphorylation of LCC            | 54e-3   | 1/ms   | [7-8]  |
| Km_PKA_LCC    | PKA phosphorylation of LCC            | 21      | μmol/L | [7-8]  |
| k_PP1_LCC     | PP1 dephosphorylation of LCC          | 8.52e-3 | 1/ms   | [7-8]  |
| Km_PP1_LCC    | PP1 dephosphorylation of LCC          | 3       | μmol/L | [7-8]  |
| k_PP2A_LCC    | PP2A dephosphorylation of LCC         | 10.1e-3 | 1/ms   | [7-8]  |
| Km_PP2A_LCC   | PP2A dephosphorylation of LCC         | 3       | μmol/L | [7-8]  |

$$PKACII_{LCC} = \frac{PKACII_{LCCtot}}{PKA_{I1tot}} \cdot PKACII$$

$$LCCa = LCC_{tot} - LCC_{ap}$$

$$\frac{dLCC_{ap}}{dt} = \frac{\epsilon \cdot k_{PKA_{LCC}} \cdot PKACII_{LCC} \cdot LCCa}{Km_{PKA_{LCC}} + \epsilon \cdot LCCa} - \frac{\epsilon \cdot k_{PP2A_{LCC}} \cdot PP2A_{LCC} \cdot LCC_{ap}}{Km_{PP2A_{LCC}} + \epsilon \cdot LCC_{ap}}$$

$$LCCb = LCC_{tot} - LCC_{bp}$$

$$\frac{dLCCbp}{dt} = \frac{\epsilon \cdot k_{PKA\_LCC} \cdot PKACII\_LCC \cdot LCCb}{Km\_PKA\_LCC + \epsilon \cdot LCCb} - \frac{\epsilon \cdot k_{PP1\_LCC} \cdot PP1\_LCC \cdot LCCbp}{Km\_PP1\_LCC + \epsilon \cdot LCCbp}$$

#### PLB

| Parameter  | Description                            | Value  | Units  | Source |
|------------|----------------------------------------|--------|--------|--------|
| PLBtot     | total phospholamban                    | 106    | μmol/L | [8]    |
| k_PKA_PLB  | PKA phosphorylation of phospholamban   | 54e-3  | 1/ms   | [7-8]  |
| Km_PKA_PLB | PKA phosphorylation of phospholamban   | 21     | μmol/L | [7-8]  |
| k_PP1_PLB  | PP1 dephosphorylation of phospholamban | 8.5e-3 | 1/ms   | [7-8]  |
| Km_PP1_PLB | PP1 dephosphorylation of phospholamban | 7.0    | μmol/L | [7-8]  |

$$PLB = PLB_{tot} - PLB_p$$

$$\frac{dPLB_p}{dt} = \frac{k_{PKA\_PLB} \cdot PKACI \cdot PLB}{Km\_PKA\_PLB + PLB} - \frac{k_{PP1\_PLB} \cdot PP1 \cdot PLB_p}{Km\_PP1\_PLB + PLB_p}$$

#### PLM

| Parameter  | Description                            | Value  | Units  | Source |
|------------|----------------------------------------|--------|--------|--------|
| PLMtot     | total phospholemman                    | 48     | μmol/L | [9]    |
| k_PKA_PLM  | PKA phosphorylation of phospholemman   | 54e-3  | 1/ms   | [9]    |
| Km_PKA_PLM | PKA phosphorylation of phospholemman   | 21     | μmol/L | [9]    |
| k_PP1_PLM  | PP1 dephosphorylation of phospholemman | 8.5e-3 | 1/ms   | [9]    |
| Km_PP1_PLM | PP1 dephosphorylation of phospholemman | 7.0    | μmol/L | [9]    |

$$PLM = PLM_{tot} - PLM_p$$

$$\frac{dPLM_p}{dt} = \frac{k_{PKA\_PLM} \cdot PKACI \cdot PLM}{Km\_PKA\_PLM + PLM} - \frac{k_{PP1\_PLM} \cdot PP1 \cdot PLM_p}{Km\_PP1\_PLM + PLM_p}$$

*TnI*

| Parameter   | Description                          | Value   | Units  | Source |
|-------------|--------------------------------------|---------|--------|--------|
| TnItot      | total troponin I                     | 70      | μmol/L | [8]    |
| PP2A_TnI    | total PP2A local to troponin I       | 0.67    | μmol/L | [8]    |
| k_PKA_TnI   | PKA phosphorylation of troponin I    | 54e-3   | 1/ms   | [8]    |
| Km_PKA_TnI  | PKA phosphorylation of troponin I    | 21      | μmol/L | [8]    |
| k_PP2A_TnI  | PP2A dephosphorylation of troponin I | 10.1e-3 | 1/ms   | [8]    |
| Km_PP2A_TnI | PP2A dephosphorylation of troponin I | 4.1     | μmol/L | [8]    |

$$TnI = TnItot - TnIp$$

$$\frac{dTnIp}{dt} = \frac{k_{PKA\_TnI} \cdot PKACI \cdot TnI}{Km_{PKA\_TnI} + TnI} - \frac{k_{PP2A\_TnI} \cdot PP2A\_TnI \cdot TnIp}{Km_{PP2A\_TnI} + TnIp}$$

*CREB*

| Parameter    | Description                    | Value  | Units  | Source  |
|--------------|--------------------------------|--------|--------|---------|
| CREBtot      | total CREB                     | 0.9    | μmol/L | adapted |
| PP2A_CREB    | total PP2A local to CREB       | 0.12   | μmol/L | adapted |
| k_PKA_CREB   | PKA phosphorylation of CREB    | 54e-3  | 1/ms   | [7-8]   |
| Km_PKA_CREB  | PKA phosphorylation of CREB    | 10     | μmol/L | adapted |
| k_PP2A_CREB  | PP2A dephosphorylation of CREB | 8.5e-3 | 1/ms   | [7-8]   |
| Km_PP2A_CREB | PP2A dephosphorylation of CREB | 2.46   | μmol/L | adapted |

$$CREB = CREBtot - CREBp$$

$$\frac{dCREBp}{dt} = \frac{k_{PKA\_CREB} \cdot nPKACII \cdot CREB}{Km_{PKA\_CREB} + CREB} - \frac{k_{PP2A\_CREB} \cdot PP2A \cdot CREBp}{Km_{PP2A\_CREB} + CREBp}$$

*AKAR FRET Reporters*

| Parameter       | Description                        | Value  | Units  | Source |
|-----------------|------------------------------------|--------|--------|--------|
| AKARnestot      | total AKAR-NES                     | 1.25   | μmol/L | [13]   |
| PP2A_AKARnes    | total PP2A local to AKAR-NES       | 0.5    | μmol/L | [14]   |
| k_PKA_AKARnes   | PKA phosphorylation of AKAR-NES    | 152e-3 | 1/ms   | [14]   |
| Km_PKA_AKARnes  | PKA phosphorylation of AKAR-NES    | 16     | μmol/L | [14]   |
| k_PP2A_AKARnes  | PP2A dephosphorylation of AKAR-NES | 8.5e-3 | 1/ms   | [7-8]  |
| Km_PP2A_AKARnes | PP2A dephosphorylation of AKAR-NES | 7      | μmol/L | [7-8]  |
| AKARnlstot      | total AKAR-NLS                     | 3.48   | μmol/L | [13]   |
| PP2A_AKARnls    | total PP2A local to AKAR-NLS       | 0.5    | μmol/L | [14]   |
| k_PKA_AKARnls   | PKA phosphorylation of AKAR-NLS    | 152e-3 | 1/ms   | [14]   |
| Km_PKA_AKARnls  | PKA phosphorylation of AKAR-NLS    | 16     | μmol/L | [14]   |
| k_PP2A_AKARnls  | PP2A dephosphorylation of AKAR-NLS | 8.5e-3 | 1/ms   | [7-8]  |
| Km_PP2A_AKARnls | PP2A dephosphorylation of AKAR-NLS | 7      | μmol/L | [7-8]  |

$$AKARnes = AKARnestot - AKARnesp$$

$$\frac{dAKARnesp}{dt} = \frac{k_{PKA\_AKARnes} \cdot PKACII \cdot AKARnes}{Km_{PKA\_AKARnes} + AKARnes} - \frac{k_{PP2A\_AKARnes} \cdot PP2A \cdot AKARnesp}{Km_{PP2A\_AKARnes} + AKARnesp}$$

$$AKARnls = AKARnlstot - AKARnlsp$$

$$\frac{dAKARnlsp}{dt} = \frac{k_{PKA\_AKARnls} \cdot nPKACII \cdot AKARnls}{Km_{PKA\_AKARnls} + AKARnls} - \frac{k_{PP2A\_AKARnls} \cdot PP2A \cdot AKARnlsp}{Km_{PP2A\_AKARnls} + AKARnlsp}$$

## References

- [1] Ryall KA, Saucerman JJ. Automated imaging reveals a concentration dependent delay in reversibility of cardiac myocyte hypertrophy. *J Mol Cell Cardiol.* 2012 Aug; 53(2): 282-90.
- [2] Bok J, Zha XM, Cho YS, Green SH. An extranuclear locus of cAMP-dependent protein kinase action is necessary and sufficient for promotion of spiral ganglion neuronal survival by cAMP. *J Neurosci.* 2003 Feb 1; 23(3): 777-87.
- [3] Prasad KM, Xu Y, Yang Z, Acton ST, French BA. Robust cardiomyocyte-specific gene expression following systemic injection of AAV: in vivo gene delivery follows a Poisson distribution. *Gene Ther.* 2011 Jan; 18(1): 43-52.
- [4] Allen MD, Zhang J. Subcellular dynamics of protein kinase A activity visualized by FRET-based reporters. *Biochem Biophys Res Commun.* 2006 Sep 22; 348(2): 716-21.
- [5] DiPilato LM, Zhang J. The role of membrane microdomains in shaping beta2-adrenergic receptor-mediated cAMP dynamics. *Mol Biosyst.* 2009 Aug; 5(8): 832-7.
- [6] Chen Y, Periasamy A. Intensity range based quantitative FRET data analysis to localize protein molecules in live cell nuclei. *J Fluoresc.* 2006 Jan; 16(1): 95-104.
- [7] Saucerman JJ, Brunton LL, Michailova AP, McCulloch AD. Modeling beta-adrenergic control of cardiac myocyte contractility in silico. *J Biol Chem.* 2003 Nov 28; 278(48): 47997-8003.
- [8] Saucerman JJ, McCulloch AD. Mechanistic systems models of cell signaling networks: a case study of myocyte adrenergic regulation. *Prog Biophys Mol Biol.* 2004 Jun-Jul; 85(2-3): 261-78.
- [9] Yang JH, Saucerman JJ. Phospholemman is a negative feed-forward regulator of Ca(2+) in beta-adrenergic signaling, accelerating beta-adrenergic inotropy. *J Mol Cell Cardiol.* 2012 Jan 20.
- [10] Goldbeter A, Koshland DE, Jr. An amplified sensitivity arising from covalent modification in biological systems. *Proceedings of the National Academy of Sciences of the United States of America.* 1981 Nov; 78(11): 6840-4.
- [11] Rich TC, Xin W, Mehats C, Hassell KA, Piggott LA, Le X, et al. Cellular mechanisms underlying prostaglandin-induced transient cAMP signals near the plasma membrane of HEK-293 cells. *Am J Physiol Cell Physiol.* 2007 Jan; 292(1): C319-31.
- [12] Bers DM. Excitation-contraction coupling and cardiac contractile force. 2nd ed. Dordrecht ; Boston: Kluwer Academic Publishers; 2001.
- [13] Sample V, Dipilato LM, Yang JH, Ni Q, Saucerman JJ, Zhang J. Regulation of nuclear PKA revealed by spatiotemporal manipulation of cyclic AMP. *Nat Chem Biol.* 2012; 8(4): 375-82.
- [14] Ni Q, Ganesan A, Aye-Han NN, Gao X, Allen MD, Levchenko A, et al. Signaling diversity of PKA achieved via a Ca2+-cAMP-PKA oscillatory circuit. *Nat Chem Biol.* 2011 Jan; 7(1): 34-40.
